# Supplementary material
Source: PubMed Central journal article supplement (PMC6282026)
Supplement: NIHMS1511707-supplement-1.pdf [file NIHMS1511707-supplement-1.pdf]

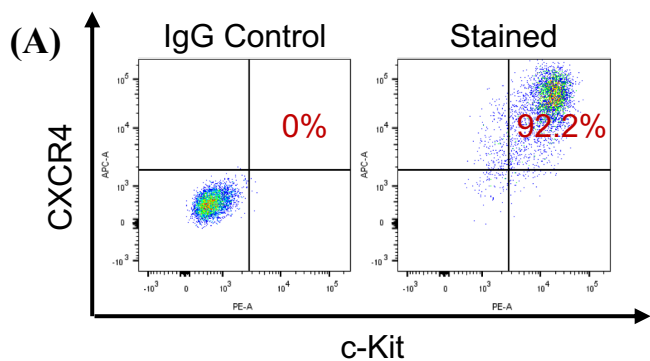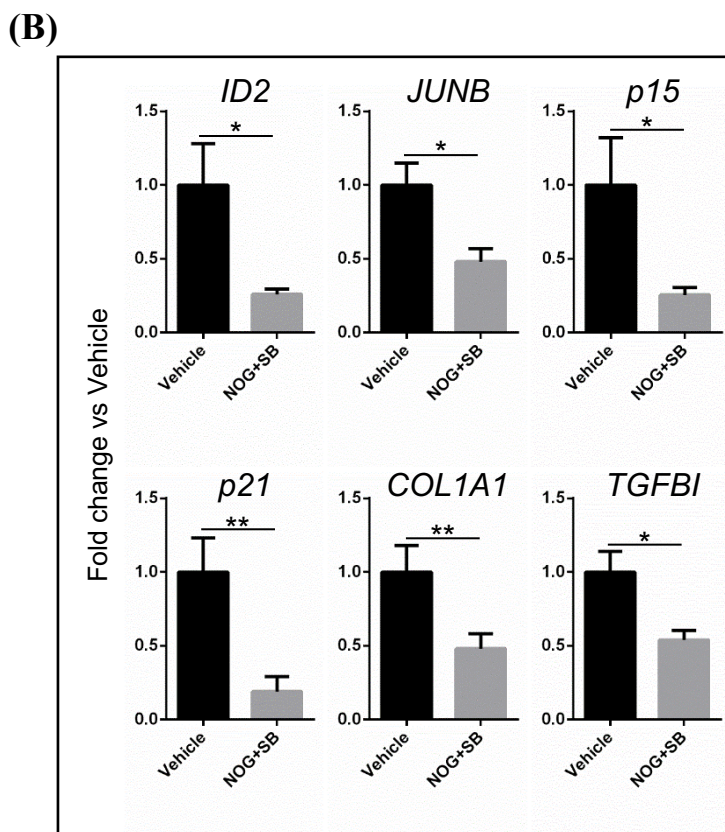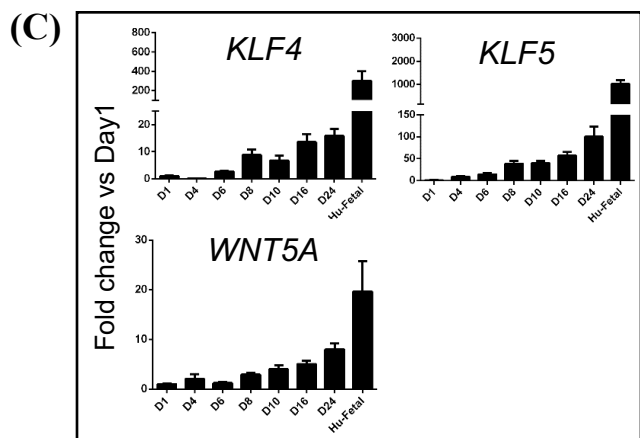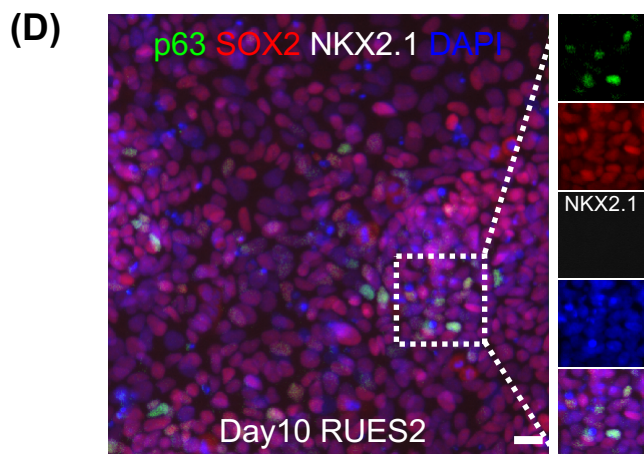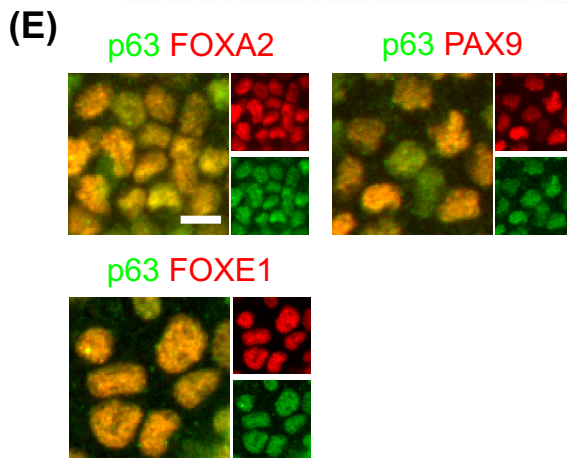

**Figure S1 (Related to Figures 1-2). Combined treatment with signaling pathway regulators promotes hESC specification towards esophageal progenitor cells (EPCs).** **(A)** Extensive endodermal commitment (CXCR4<sup>+</sup> c-KIT<sup>+</sup>) of RUES2 cells after 3-day differentiation as indicated by flowcytometric analysis. **(B)** Treatment with NOGGIN and SB431542 (Day6-16) significantly reduced the expression of the BMP downstream targets ID2 and JUNB and the TGFβ downstream targets p15, p21, COL1A1 and TGFBI at day16 of cell culture. The transcript levels were represented by the fold change compared to Vehicle controls. Data represent mean ± SEM (n = 3). \*p < 0.05, \*\*p < 0.01 by unpaired, two-tailed Student's t test. **(C)** Expression of the esophageal markers *KLF4*, *KLF5* and *WNT5A* during EPC differentiation. Human fetal esophagus (Hu-Fetal) was included as control. The transcript levels were represented by the fold change compared to day 1 (D1) hESC. Data represent mean ± SEM (n = 3). **(D)** A small population of p63<sup>+</sup> SOX2<sup>+</sup> NKX2.1<sup>-</sup> EPCs are present at day10 of differentiation. **(E)** EPCs at day10 differentiation express EPC markers FOXA2, FOXE1 and PAX9. Scale bars: (D) 20 μm, (E) 10 μm.

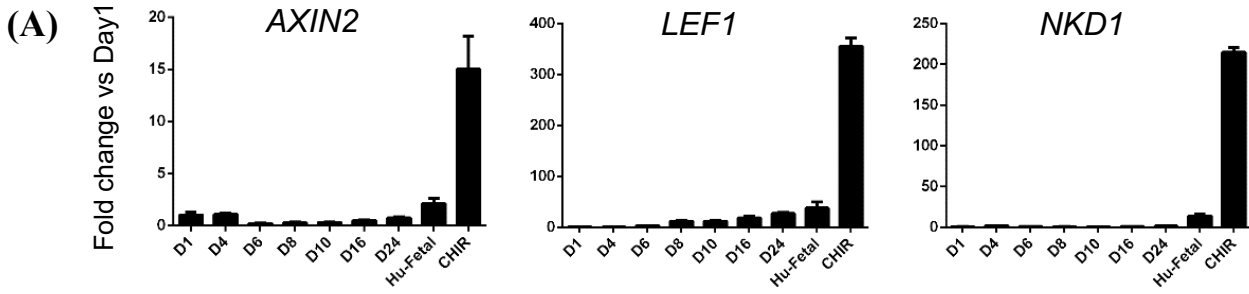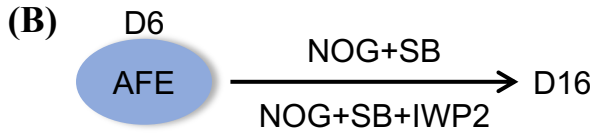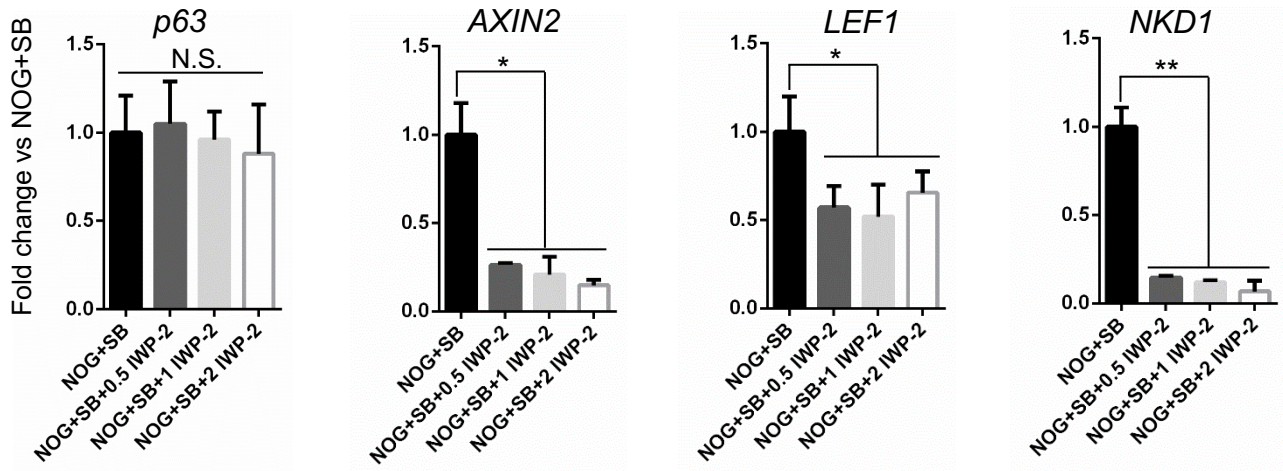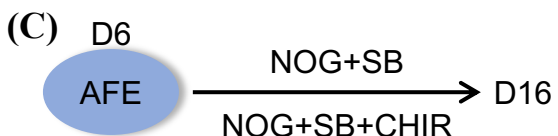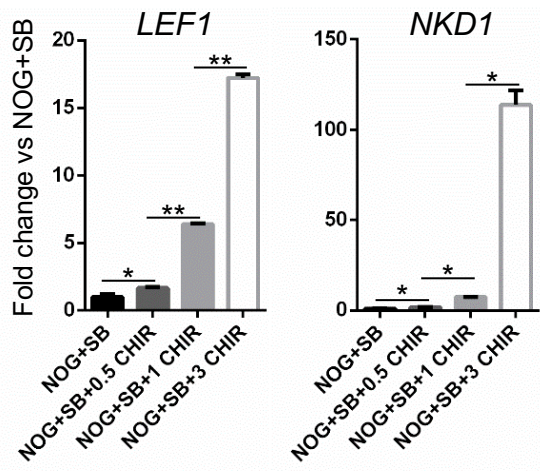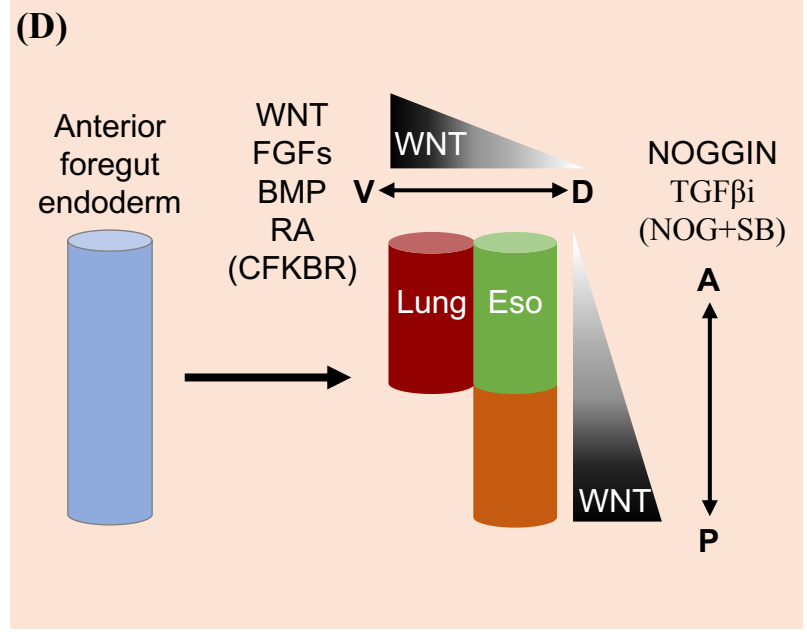

**Figure S2 (Related to Figures 1-2). Combined in- and activation of multiple signaling pathways promotes sequential differentiation of PSCs towards esophageal progenitor cells. (A)** Expression of the WNT signaling downstream targets *AXIN2*, *LEF1* and *NKD1* during EPC differentiation. Human fetal esophagus (Hu-Fetal) was included as control. hESC RUES2-derived AFE cells treated with 3  $\mu$ M CHIR (Day6-16) was included as a positive control. The transcript levels were represented by the fold change compared to day 1 (D1) hESC. Data represent mean  $\pm$  SEM (n = 3). **(B)** WNT inhibition by IWP2 does not affect esophageal specification. RUES2-derived AFE cells were treated with Noggin (NOG) plus SB431542 (SB) in combination with 0.5, 1 or 2  $\mu$ M IWP2 from day6 to day16. Gene expression was determined at day16. The transcript levels of were represented by the fold change compared to NOG+SB. Data represent mean  $\pm$  SEM (n = 3). \*p < 0.05, \*\*p < 0.01 by unpaired, two-tailed Student's t test. N.S., not significant. **(C)** WNT activation by 0.5, 1 or 3  $\mu$ M CHIR increased the transcript levels of the WNT targets LEF1 and NKD1. The transcript levels of were represented by the fold change compared to NOG+SB. Data represent mean  $\pm$  SEM (n = 3). \*p < 0.05, \*\*p < 0.01 by unpaired, two-tailed Student's t test. **(D)** Schematics of generating esophageal progenitor cells from the hPSC-derived AFE cells. While WNT, FGF, BMP and retinoic acid signaling activation by the CFKBR cocktail promotes respiratory cell fate, BMP and TGF $\beta$  dual inhibition by Noggin and SB431542 promotes esophageal cell fate. Additionally, WNT activation combined with BMP and TGF $\beta$  dual inhibition posteriorizes the foregut. NOG, Noggin; SB, SB431542.



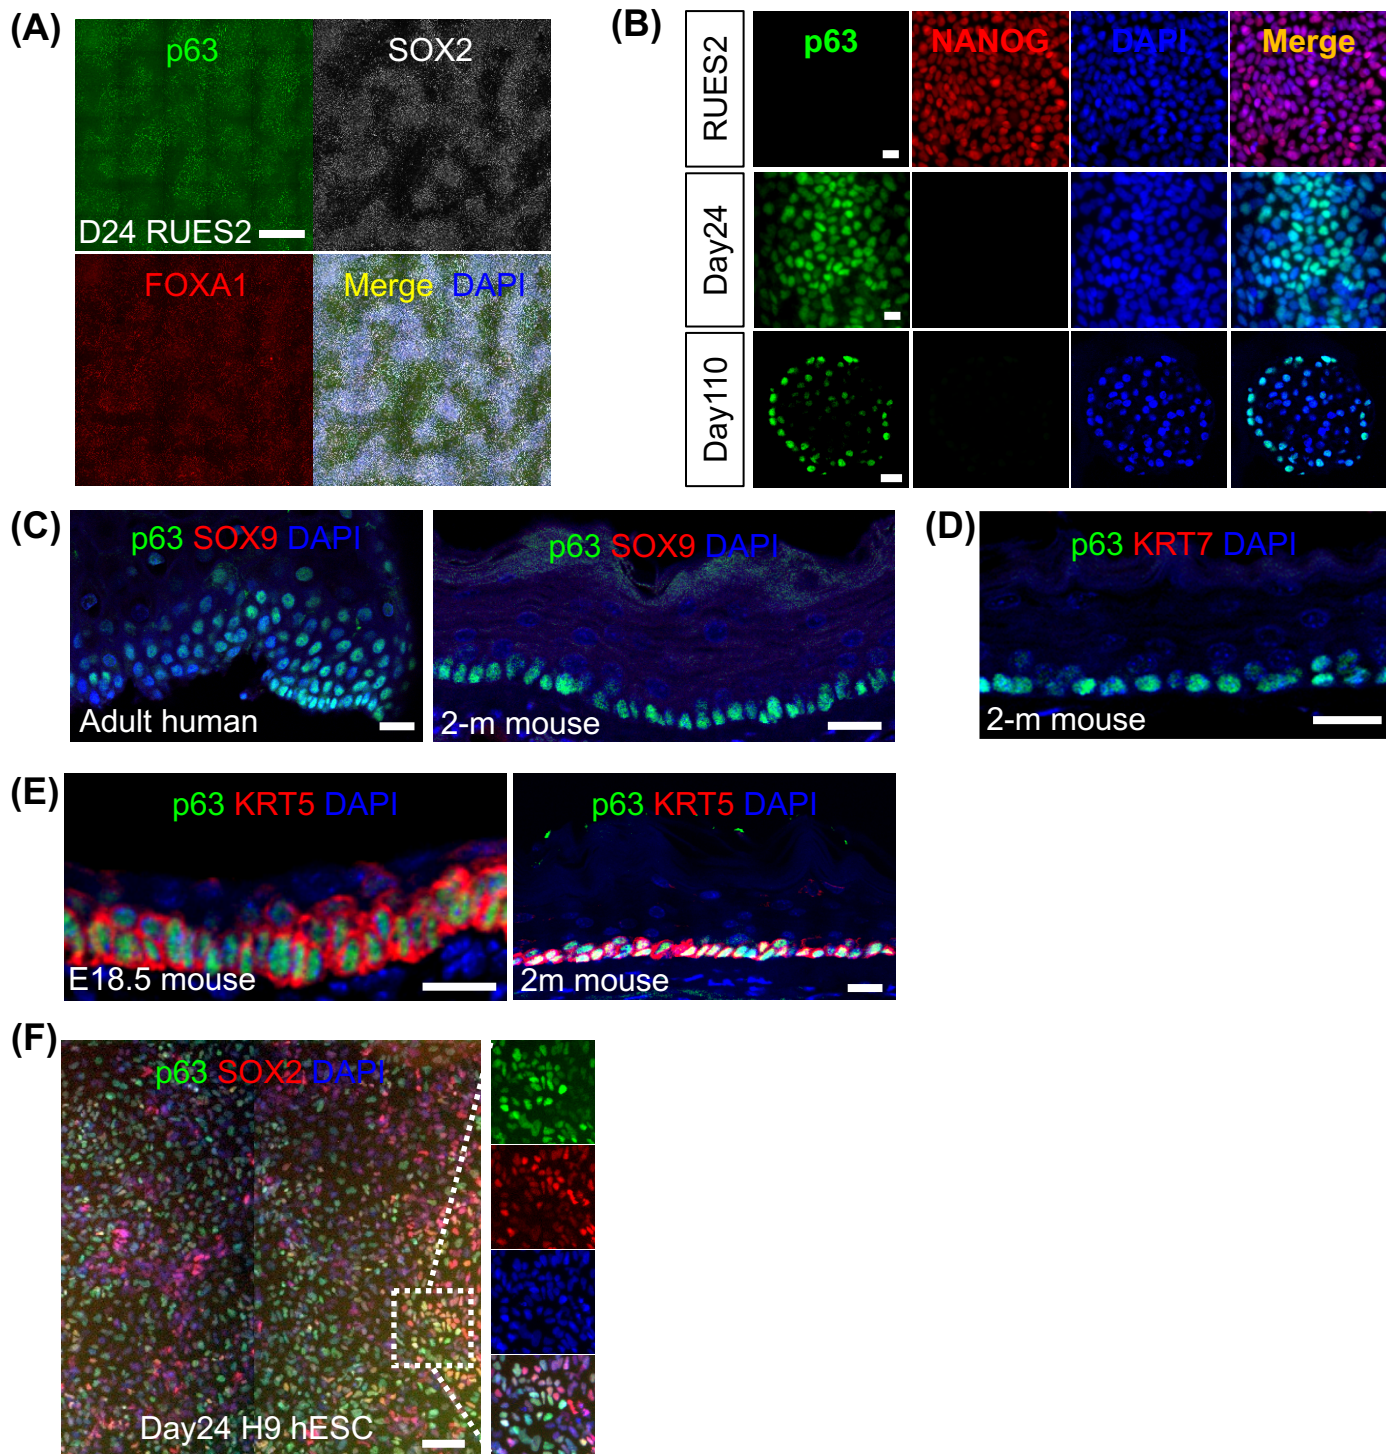

**Figure S3 (Related to Figures 1-3). Expression of epithelial markers in the mouse and human esophagus** (A) Representative 20x tile scans of RUES2-derived esophageal progenitor cells of day24 culture (n = 5). (B) NANOG is expressed in hESC RUES2 but not in p63<sup>+</sup> EPCs in 2D differentiation culture at day24 and in 3D organoid culture at day110. (C) SOX9 is not expressed in the adult human and mouse esophagus. (D) KRT7 expression is lost in the adult mouse esophagus. (E) Expression of p63 and KRT5 in the basal progenitor cells of the stratified squamous epithelium in E18.5 and adult mouse esophagus. (F) Representative tile scan images of EPCs (p63<sup>+</sup> SOX2<sup>+</sup>) derived from the hESC H9 cell line. Note EPCs coexpress p63 and SOX2. Abbreviation: m, month. Scale bars: (A) 1 mm, (B-F) 20  $\mu$ m, (H) 100  $\mu$ m.

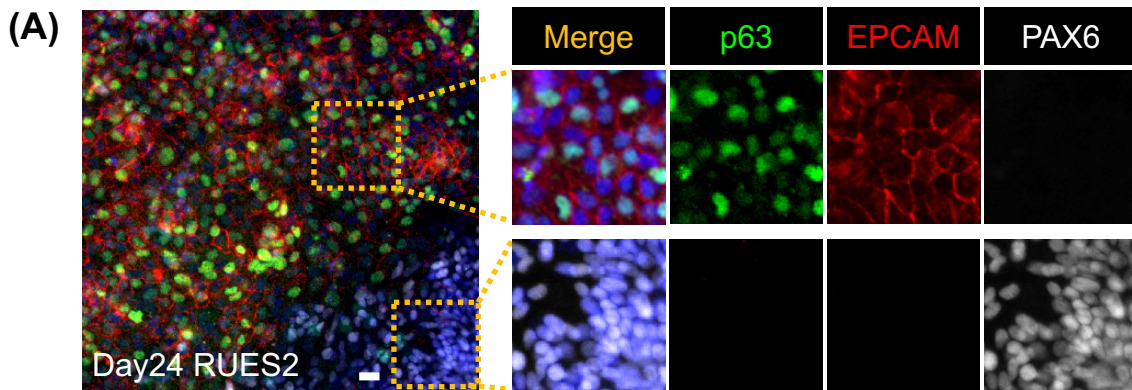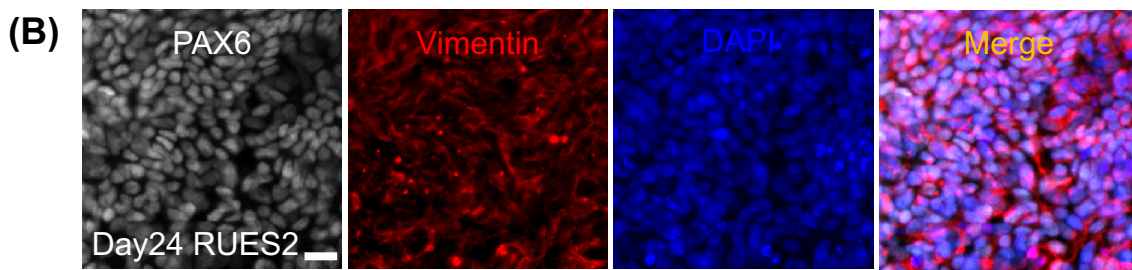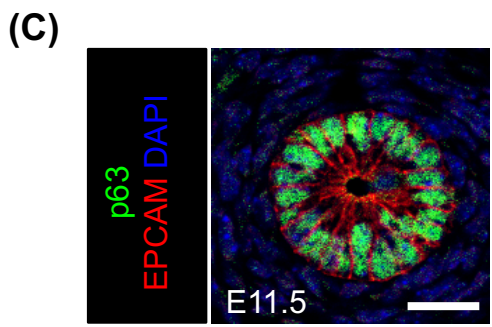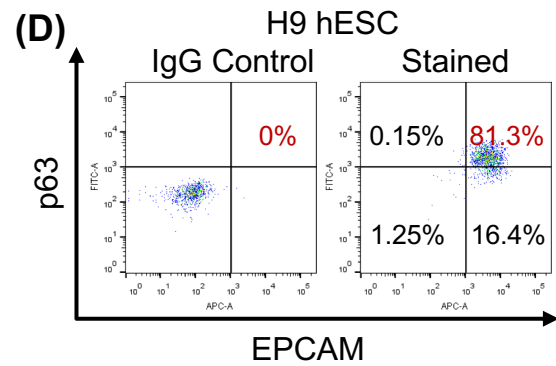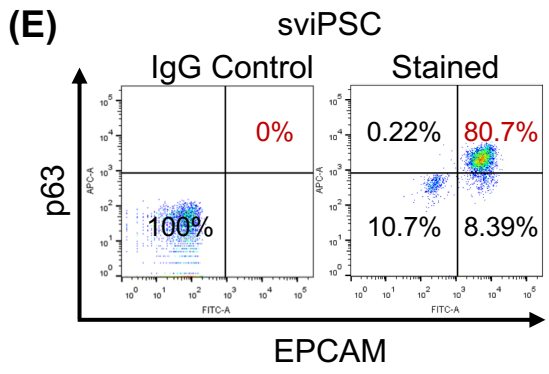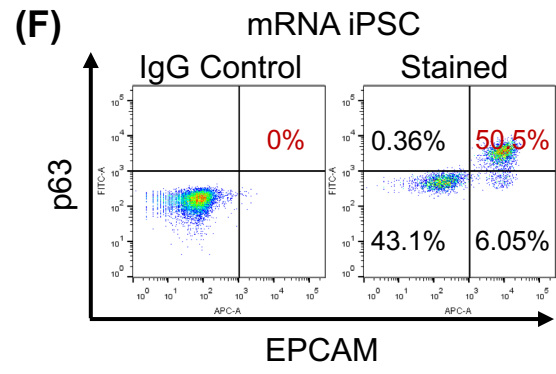

**Figure S4 (Related to Figures 3-4). Purification of EPCs from differentiating PSCs.** **(A-B)** The majority of non-epithelial cells (EPCAM<sup>-</sup>) in day24 RUES2 culture are neuroectodermal cells (PAX6<sup>+</sup> EPCAM<sup>-</sup> p63<sup>-</sup>). Note p63<sup>+</sup> EPCAM<sup>+</sup> cells are PAX6<sup>-</sup> (A), and co-expression of PAX6 and Vimentin in RUES2-derived cells (B). **(C)** p63 and EPCAM are co-expressed in the E11.5 mouse esophagus. **(D)** After 24day differentiation, EPC yield (p63<sup>+</sup> EPCAM<sup>+</sup>) for the hESC H9 cell line is  $80.6 \pm 4.2\%$  (n = 3). **(E-F)** After 24day differentiation, yield for sviPSC- and mRNA iPSC-derived EPCs is  $80.2 \pm 6.5\%$  (n=3) and  $50.1 \pm 3.5\%$  (n=3 for each), respectively. Scale bars: 20  $\mu\text{m}$ .

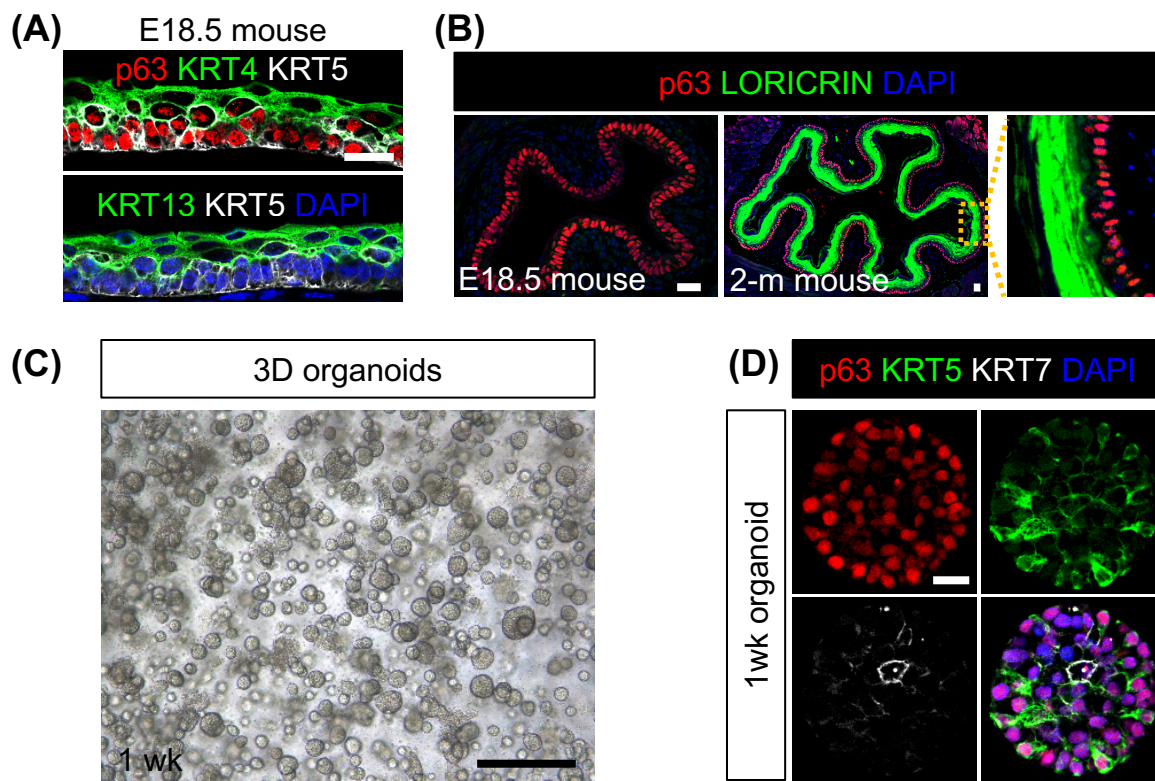

**Figure S5 (Related to Figures 4-5). hPSC-derived EPCs reconstitute the stratified squamous epithelium. (A)** Expression of p63, KRT4, KRT5 and KRT13 in E18.5 mouse esophagus. Note the expression of KRT5 is limited to p63<sup>+</sup> basal cells and KRT4 and KRT13 are expressed in the suprabasal cells. **(B)** LORICRIN is expressed in 2-month but not E18.5 mouse esophagus. **(C)** Bright images of 1-week 3D organoids established using RUES2-derived EPCs (n = 3). **(D)** The expression of KRT7 is diminished while the expression of the basal cell marker KRT5 is maintained in 1-week 3D esophageal organoids. Scale bars: (A, B, D) 20  $\mu$ m, (C) 1 mm.



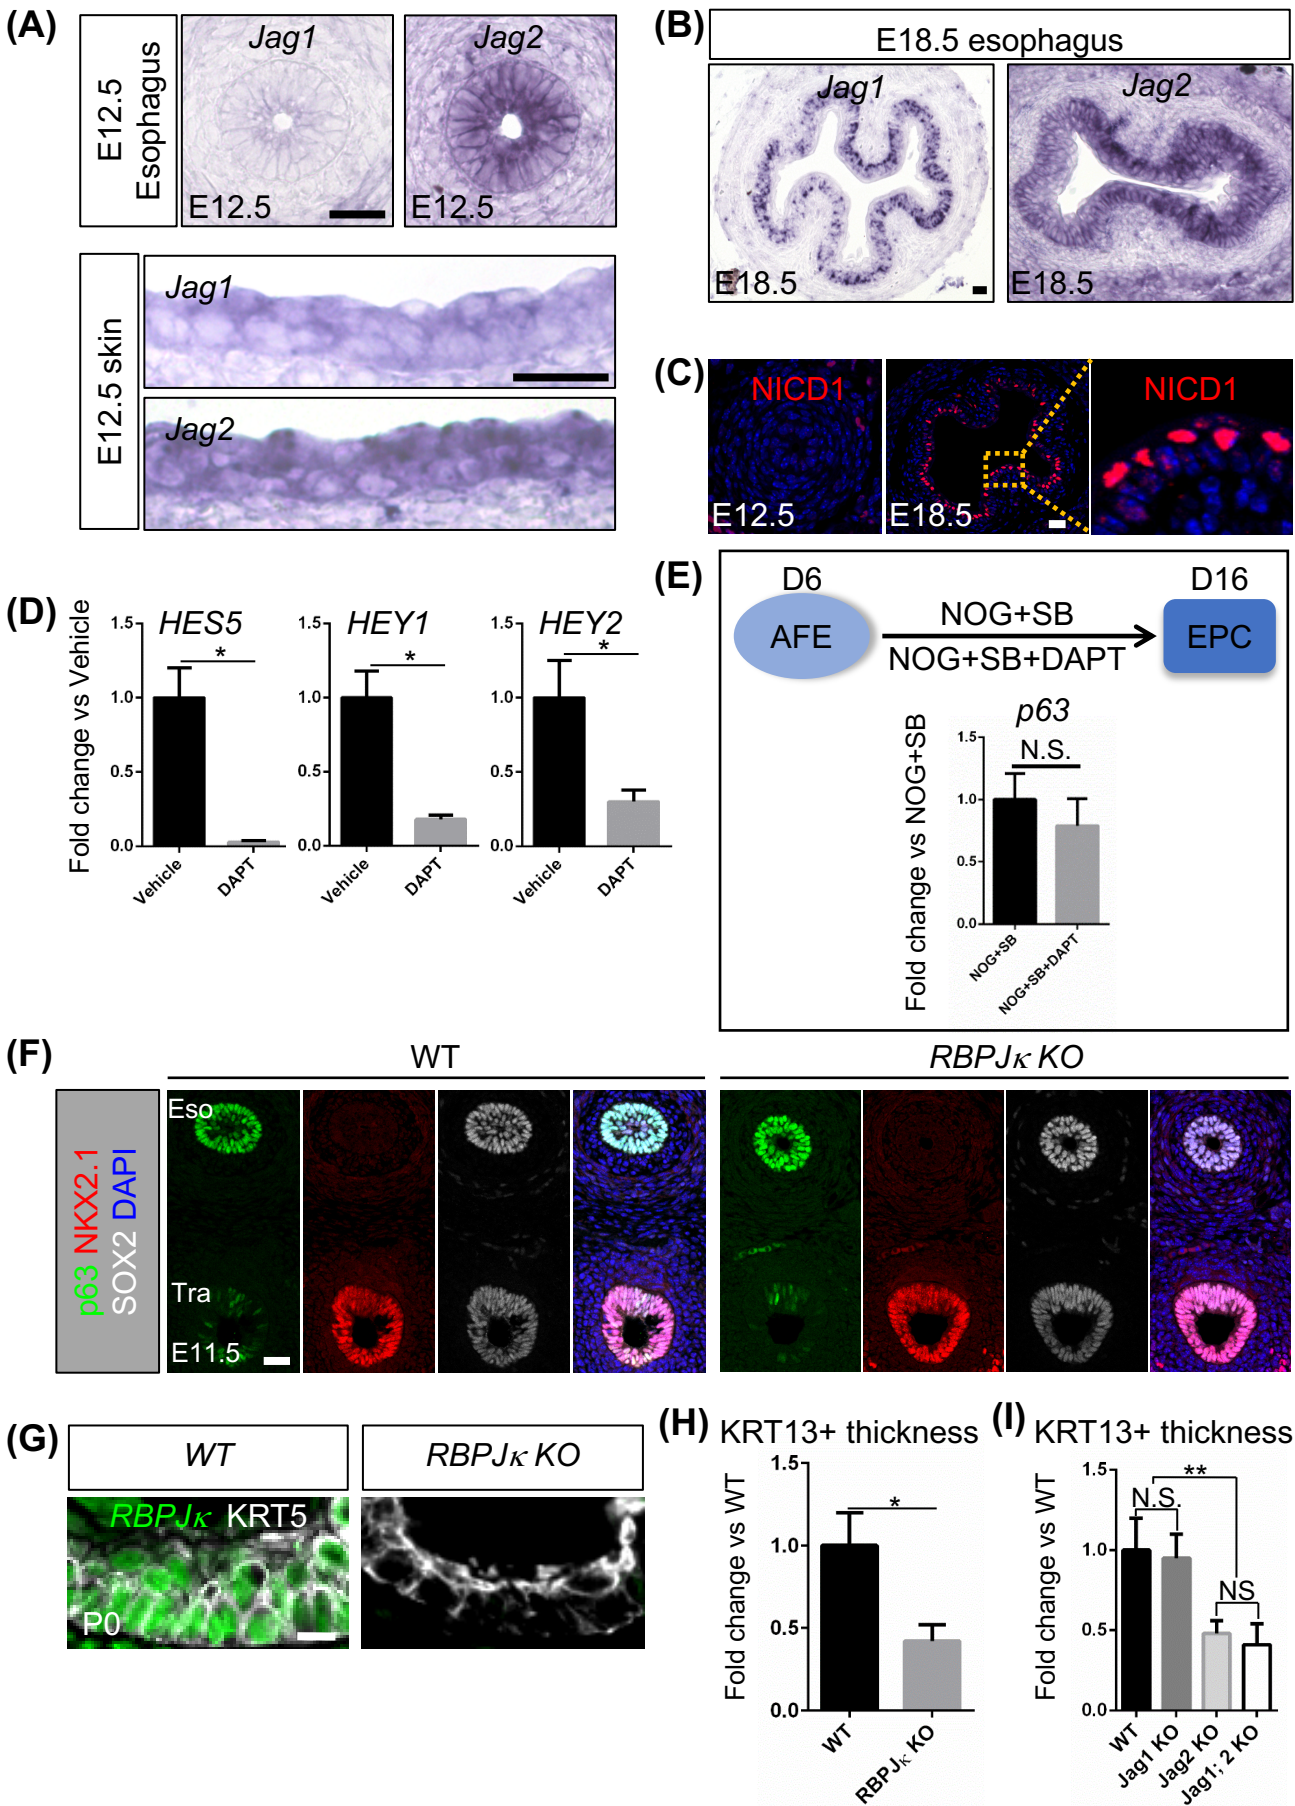

**Figure S6 (Related to Figures 6-7). NOTCH signaling is required for the formation of the stratified squamous epithelium. (A-B)** RNA in situ hybridization of *Jag1* and *Jag2* in E12.5 mouse esophagus and skin (A) and E18.5 mouse esophagus (B). **(C)** Expression of Notch1 Intracellular Domain (NICD1) is correlated with the squamous differentiation of epithelial progenitors. Note at E12.5 the levels of NICD1 are too low to be detected whereas at E18.5 NICD1 is expressed in the differentiated (suprabasal) cell. **(D)** The transcript levels of *HES5*, *HEY1* and *HEY2* are decreased in EPCs following treatment of 10  $\mu$ M DAPT ( $\gamma$ -secretase inhibitor) for 6 days. The transcript levels were represented by the fold change compared to Vehicle controls. Data represent mean  $\pm$  SEM (n = 3). \*p < 0.05 by unpaired, two-tailed Student's t test. EPCs were derived from RUES2 by culturing for 24days. **(E)** Inhibition of NOTCH signaling by DAPT did not affect EPC specification from the hESC-derived AFE. The transcript levels were represented by the fold change compared to NOG+SB. **(F)** Expression of p63, NKX2.1 and SOX2 in the epithelium of *Shh-Cre; RBPJ $\kappa$ <sup>loxp/loxp</sup>* (*RBPJ $\kappa$  KO*) mutants at E11.5 (n = 4). Note p63 is expressed in *RBPJ $\kappa$  KO* mutants. **(G)** Expression of *RBPJ $\kappa$*  is lost in the epithelium of *Shh-Cre; RBPJ $\kappa$ <sup>loxp/loxp</sup>* (*RBPJ $\kappa$  KO*) mutants at P0. **(H)** Thickness of KRT13<sup>+</sup> suprabasal layers is reduced in P0 *RBPJ $\kappa$  KO* mutants. Data represent mean  $\pm$  SEM (n = 4). \*p < 0.05 by unpaired, two-tailed Student's t test. **(I)** Thickness of KRT13<sup>+</sup> suprabasal layers is reduced in the esophagus of *Shh-Cre; Jag2<sup>loxp/loxp</sup>* (*Jag2 KO*) and *Shh-Cre; Jag1<sup>loxp/loxp</sup>; Jag2<sup>loxp/loxp</sup>* (*Jag1; 2 KO*) mutants. Data represent mean  $\pm$  SEM (n = 3). \*\*p < 0.01 by unpaired, two-tailed Student's t test. N.S., not significant. Abbreviation: Tra, trachea; Eso, esophagus. Scale bars: 20  $\mu$ m.

Table S1

| Genes      | Forward primers             | Reverse primers              |
|------------|-----------------------------|------------------------------|
| AXIN2      | TGTCCAGCAAAACTCTGAGG        | GTGCAAAGACATAGCCAGAAC        |
| p21        | TGTCAGTGTCTTGTACCCTTG       | GGCGTTTGGAGTGGTAGAA          |
| COL1A1     | CCCCTGGAAAGAATGGAGATG       | TCCAAACCACTGAAACCTCTG        |
| FOXA1      | AGGGCTGGATGGTTGTATTG        | TGAGTTCATGTTGCTGACCG         |
| FOXA2      | CTGGTCGTTTGTGTGGC           | TTCATGTTGCTCACGGAGG          |
| FOXE1      | GAGCCTGCTACAACCCTG          | TGTGTCTATGAGTTTTCTGTC        |
| HES5       | CTACCTGAAGCACAGCAAAG        | AGCTTCATCTGCGTGTGC           |
| HEY1       | TGGTACCCAGTGCTTTTGAG        | CTCCGATAGTCCATAGCAAGG        |
| HEY2       | ATTATAGAGAAAAGGCGTCGG<br>G  | GCATCTTCAAATGATCCACTGT<br>C  |
| HNF6A      | GAGGATGTGGAAGTGGCTG         | ACATCTGTGAAGACCAACCTG        |
| ID2        | CATCCCACTATTGTCAGCCTG       | AGAAGGGAATTCAGAAGCCTG        |
| INVOLUCRIN | CTGCCTCAGCCTTACTGTG         | GCTCCTGATGGGTATTGACTG        |
| JAG1       | GGACTATGAGGGCAAGAACTG       | AAATATAACCGCACCCCTTCAG       |
| JAG2       | CAGGAAGTGATCGGGTTCG         | CAGACAAGGCTTCCATCCG          |
| JUNB       | GGACACGCCTTCTGAACG          | CGGAGTCCAGTGTGGTTTG          |
| KLF4       | ACCTACACAAAGAGTTCCCATC      | TGTGTTTACGGTAGTGCCTG         |
| KLF5       | GAAGGAGTAACCCCGATTTGG       | CTTCCCAGGTACACTTGTATGG       |
| KRT13      | AAGACCATTGAAGAGCTCCG        | TGGCATTGTCAATCTCCAGG         |
| KRT14      | GAAGTGAAGATCCGTGACTGG       | GCAGAAGGACATTGGCATTG         |
| KRT4       | AGCTAGATACCTTGGGCAATG       | CACAAAGTCATTCTCGGCTG         |
| KRT5       | AGAGCTGAGAAACATGCAGG        | AGCTCCACCTTGTTTCATGTAG       |
| KRT7       | CAGGATATGGCACGGCAG          | CACAGAGATATTCACGGCTCC        |
| LEF1       | AGACAAGCACAAACCTCTCAG       | TCATTATGTACCCGGAATAACT<br>CG |
| NANOG      | GAAATACCTCAGCCTCCAGC        | GCGTCACACCATTGCTATTC         |
| NKD1       | CTCGCCGGGATAGAAAACCTAC      | GGTGTGGGATGTGGATGG           |
| NKX2.1     | CAGGACACCATGAGGAACAG        | TCATGTTTCATGCCGCTCG          |
| p15        | GTTAAGTTTACGGCCAACGG        | ACCTTCTCCACTAGTCCCC          |
| p63        | TTCGGACAGTACAAAGAACGG       | GCATTTTCATAAGTCTCACGGC       |
| PAX9       | GGTGAACGGGTTGGAGAAG         | CTGTAGGTCATGTAAGGCGAC        |
| PROX1      | TTTTATACCCGTTATCCCAGCT<br>C | TGCGTACTTCTCCATCTGAATG       |
| SOX2       | CACACTGCCCTCTCAC            | TCCATGCTGTTTCTTACTCTCC       |
| SOX9       | ACTTGCACAACGCCGAG           | CTGGTACTTGTAATCCGGGTG        |
| TGFBI      | GTCTACACAGTCTTTGCTCCC       | TCCGCTAACCAAGGATTTTCATC      |
| WNT5A      | TCGCCAGGTTGTAATTGAAG        | TGAGAAAGTCCTGCCAGTTG         |

**Table S1 (Related to the STAR Methods Section, Quantitative Real-Time Polymerase Chain Reaction (qRT-PCR). Primer sequences for qRT-PCR.**
